1 **Use of digital technology tools to characterize patient**  
2 **adherence to prescription-grade omega-3**  
3 **polyunsaturated fatty acid therapy: Primary results of**  
4 **the DIAPAsOn prospective observational study**

5  
6 Gregory P. Arutyunov MD, PhD,<sup>1\*</sup> Alexander G. Arutyunov MD, PhD,<sup>2</sup> Fail  
7 T. Ageev MD PhD,<sup>3</sup> Tatiana V. Fofanova MD, PhD<sup>4</sup>

8  
9 <sup>1</sup>Department of Internal Medicine, Pirogov Russian National Research Medical University,  
10 Moscow. e-mail: [arut@ossn.ru](mailto:arut@ossn.ru)

11  
12 ORCID: 0000-0002-6645-2515

13  
14  
15 <sup>2</sup>Department of Internal Medicine, Pirogov Russian National Research Medical University,  
16 Moscow. email: [agarutyunov@mail.ru](mailto:agarutyunov@mail.ru)

17  
18 ORCID: 0000-0003-1180-3549

19  
20  
21 <sup>3</sup>Department of Outpatient Medical and Diagnostic Technologies, Myasnikov Institute of  
22 Clinical Cardiology, National Medical Research Center for Cardiology, Moscow. email:  
23 [ftageev@gmail.com](mailto:ftageev@gmail.com)

24  
25 ORCID: 0000-0003-4369-1393

26  
27 <sup>4</sup>Department of Outpatient Medical and Diagnostic Technologies, Myasnikov Institute of  
28 Clinical Cardiology, National Medical Research Center for Cardiology, Moscow. email:  
29 [t.fofanova@yandex.ru](mailto:t.fofanova@yandex.ru)

30  
31 ORCID: 0000-0002-3321-2902

32 *\*Author for correspondence*

33  
34 **Keywords:** Omega-3-acid ethyl esters; myocardial infarction; hypertriglyceridemia,  
35 adherence; compliance; persistence; mhealth; ehealth; patient-reported outcomes

36  
NOTE: This preprint reports new research that has not been certified by peer review and should not be used to guide clinical practice.

## 37 **Abstract**

38 **Background, objectives and methods:** DIAPAsOn was a 6-month prospective  
39 observational multicenter study in the Russian Federation that examined adherence to  
40 a preparation of highly purified omega-3 polyunsaturated fatty acids (OMACOR) in  
41 adult patients with a history of recent myocardial infarction or endogenous  
42 hypertriglyceridemia. A full description of the study's aims and methods has appeared  
43 in *JMIR Res Protoc*. A feature of DIAPAsOn was the use of a bespoke electronic  
44 patient engagement and data collection system.

45 **Results:** The net average reduction from baseline in both total and low-density  
46 lipoprotein cholesterol was approximately 1 mmol/L and the net average increment in  
47 high-density lipoprotein cholesterol was  $0.2 \pm 0.53$  mmol/L. Mean triglyceride levels  
48 declined by  $\sim 1.3$  mmol/, from an initial level of  $2.99 \pm 1.29$  mmol/L to  $1.67 \pm 0.67$   
49 mmol/L. The percentage of patients with triglyceride  $< 1.7$  mmol/L rose from 13.1% at  
50 baseline to 54% at study-end.

51  
52 Digital reporting of adherence was registered by 8.3% of patients (n=180) and average  
53 scores indicted poor adherence. However, clinic-based enquiry suggested high levels  
54 of adherence.

55  
56 Data on health-related quality of life accrued from digitally-engaged patients identified  
57 improvements among patients reporting high adherence to study treatment, but  
58 patient numbers were small.

59  
60 **Conclusions:** The lipid and lipoprotein findings indicate that OMACOR had nominally  
61 favorable effects on the blood lipid profile. Less than 10% of patients enrolled in  
62 DIAPAsOn used the bespoke digital platform piloted in the study and the level of self-  
63 reported adherence to medication by those patients was also low. Reasons for this low  
64 uptake and adherence are unclear. Better adherence was recorded by clinical report.

65

## 66 Introduction

67 Non-high-density lipoprotein cholesterol blood lipids are a source of residual  
68 cardiovascular risk in patients whose low-density lipoprotein cholesterol (LDL-C) levels  
69 are well controlled by medication, primarily statins [1-9].

70

71 Optimal risk reduction in cardiovascular disease, as in other forms of major non-  
72 communicable diseases, depends substantially on patients continuing to take their  
73 medications for extended periods of time. This can be a particular challenge in  
74 conditions such as hyperlipidemia, where the connection between symptomless  
75 elevations of blood lipid levels and major cardiovascular events can seem abstract or  
76 remote [10,11].

77 Recent comparative research in Russia and Norway has disclosed poor attainment of  
78 cholesterol targets in both countries, despite a notably higher prescription rate of these  
79 drugs in Norway [12]. Suboptimal patient adherence to prescribed treatments is likely  
80 to be a contributor to such findings, which illustrates that the challenges of promoting  
81 and sustaining adherence to therapy are not confined to any one country. It is  
82 nevertheless clear from the results of the CEPHEUS II study that failure to reach  
83 targets for lipid-based risk reduction is widespread in Russia [13]. Patient-related  
84 factors associated with non-attainment of targets identified in that study included  
85 considering it acceptable to miss prescribed doses more than once per week. Poor  
86 adherence to medication for hypertension has likewise been documented in the  
87 Izhevsk Family Study II [14].

88 Those findings exemplify observations that the rates of both discontinuation and non-  
89 adherence to therapy are uniformly high in clinical trials of lipid-lowering drugs and  
90 even higher in unselected populations, with adherence deteriorating in proportion to  
91 the duration of follow-up [15]. Analysis of a large Swiss healthcare claims database  
92 (N=4349) revealed that overall adherence to drug therapy for secondary  
93 cardiovascular prevention after myocardial infarction (MI) was only moderate, but that  
94 patients with high adherence to lipid-lowering therapy had a significantly reduced risk  
95 for all-cause mortality and major cardiovascular events, illustrating the potential for  
96 improvement of longer-term outcomes [16].

97

98 OMACOR (hereafter OM3EE; license holder Abbott Laboratories GmbH) is a  
99 preparation of highly purified long-chain omega-3 polyunsaturated fatty acids (n-3  
100 PUFAs) (eicosapentanoic acid/docosohexanoic acid in a 1.2:1 ratio and 90% purity)  
101 available as a prescription-only medication and widely approved for use, at a daily  
102 dose of 1 g, for the secondary prevention of major cardiovascular events in patients  
103 who have survived an MI, or at doses of 2–4 g/day for the regulation of triglycerides  
104 (TG). Prescription-only n-3 PUFAs (PnP) such as OM3EE are qualitatively distinct  
105 from dietary n-3 PUFA supplements and have been evaluated in a range of clinical  
106 trials [17,18].

107 The emergence of widely available digital and internet technologies with the potential  
108 to provide immediate bidirectional communication between healthcare professionals  
109 (doctors, nurses and pharmacists) and patients may be an important new resource for  
110 promoting long-term adherence to therapies [19]. The DIAPAsOn study was devised  
111 to explore patient adherence to OM3EE therapy through the medium of digital  
112 technology tools.

113

## 114 **Methods**

115

### 116 Overview

117

118 A comprehensive description of the methodology of the DIAPAsOn study has been  
119 published, including baseline demographic data [20].

120

121 Briefly, DIAPAsOn was a prospective observational study conducted at >100 centers  
122 in the Russian Federation and devised to examine adherence to a prescription of  
123 OM3EE as either a secondary preventive medical therapy (at a dose of 1 g/day) for  
124 patients with a history of recent MI or for blood lipid regulation (at doses of 2–4 g/day)  
125 in patients with endogenous hypertriglyceridemia insufficiently responsive to dietary  
126 modification or drug therapy.

127

128 Participants were required to be adults ( $\geq 18$  years) with a history of MI for whom  
129 OM3EE was prescribed as part of a secondary prevention strategy or to have  
130 Fredrickson endogenous type IIb or III hypertriglyceridemia not satisfactorily controlled  
131 by statin therapy or Fredrickson endogenous type IV hypertriglyceridemia not

132 sufficiently controlled by a lipid-moderating diet. In addition, patients should have been  
133 taking OM3EE for not >2 weeks prior to enrolment.

134

135 DIAPAsOn is registered at [www.ClinicalTrials.gov](http://www.ClinicalTrials.gov) (NCT03415152).

136

#### 137 Schedule of visits and data collection

138 The DIAPAsOn study had a scheduled duration of 6 months. Clinic visits were  
139 scheduled at the start of the study (Visit 1) and then at approximately 3 months (Visit  
140 2) and at the end of the study (Visit 3). At each of the three scheduled clinic visits,  
141 patients were questioned about compliance with OM3EE therapy using the  
142 Questionnaire of Treatment Compliance [21]. This instrument, which has been used in  
143 Russia to investigate compliance with other cardiovascular medications, produces a  
144 numerical indication of compliance, as follows: 12–15 points, very high; 8–11 points,  
145 high; 4–7, moderate; and 0–3, low.

146

147 Blood lipid profile was determined at each visit, along with blood pressure and heart  
148 rate data, adverse events and hospitalization were recorded. Patients also received  
149 inter-visit phone calls focused on adherence to therapy and safety.

150

151 A central aspect of DIAPAsOn was the use of remote digital technology that allowed  
152 patients to submit data and report on matters such as health-related quality of life  
153 (HRQoL) and product usability (very good, good, moderate, poor).

154

155 The electronic patient engagement and data collection system used in DIAPAsOn was  
156 developed in collaboration with the medical online platform ROSMED.INFO (Moscow,  
157 Russian Federation; [www.rosmed.info](http://www.rosmed.info)), which has wide-ranging experience in the  
158 development and operation of mobile health applications in the Russian Federation. A  
159 fuller description of the system used in DIAPAsOn featured in the separate publication  
160 of methodology [20].

161

162 All aspects of the DIAPAsOn study, including the associated mobile health app,  
163 conformed to relevant extant national and international legal and ethical regulations  
164 and requirements for the conduct of clinical research in human subjects, including the

165 provisions of the Declaration of Helsinki, including patients' right to decline further  
166 participation in DIAPAsOn at any time and for any reason, whether stated or not,  
167 without prejudice to their subsequent treatment. Ethical oversight of the DIAPAsOn  
168 study was exercised by the independent Interuniversity Ethics Committee (Moscow,  
169 Russian Federation). A list of center investigators appears in *Appendix 1*.

170

### 171 Statistical methods

172 Methods were predominantly descriptive, conducted in accordance with the pre-  
173 approved statistical analysis plan, and used the statistical programming language R  
174 (version 3.4.3; <https://mran.microsoft.com/releases/3.4.3>).

175

176 The primary endpoint—adherence to therapy with OM3EE in post-MI patients or  
177 patients with hypertriglyceridemia—was assessed in an analysis population, defined  
178 as those patients for whom data were obtained at least at Visits 1 and 2.

179

180 Analysis of the primary endpoint included determination at the end of the study (Visit  
181 3) of the mean adherence rate, which was defined as the number of days for which the  
182 patient took the full prescribed dose of OM3EE during the specified period divided by  
183 the total number of days in that period. The mean score on the National Questionnaire  
184 of Treatment Compliance was calculated at the same time.

185

186 Comparison of individual patient data between visits was based on either Student's t-  
187 test (for dependent variables) or McNemar's test (for qualitative data).

188

189

## 190 Results

191  
192 A total of 3000 patients were initially included in the program but 428 (14.3%) were  
193 excluded because Visit 1 data were incomplete. Valid and complete data from Visit 1  
194 were available for 2572 patients (85.7%), who constituted the safety population. After  
195 exclusion of 405 patients lost before Visit 3, an analysis population of 2167 patients  
196 was derived, representing 72.2% of total enrolled patients (Figure 1), of whom 898  
197 (41.4%) were taking OM3EE for secondary prevention after MI and 1269 (58.6%)  
198 were taking OM3EE for hypertriglyceridemia.

199 DIAPAsOn was completed per protocol by 1975 patients (secondary prevention,  
200 n=780; hypertriglyceridemia, n=1195). This was an almost wholly Caucasian  
201 population (97.74%) with a near-equal sex distribution (men, 52.8%; women, 47.2%),  
202 an average age of  $\approx 60$  years and an average body mass index (BMI) of 30 kg/m<sup>2</sup>.  
203 There were more men than women in the secondary prevention subgroup (n=608;  
204 67.7%), whereas women outnumbered men in the hypertriglyceridemia subgroup  
205 (n=732; 57.68%). Investigator-assessed 'clinically significant' abnormalities of systolic  
206 and diastolic blood pressure (BP) were recorded in 21.4% and 12.8% of patients,  
207 respectively.

208 As illustrated in Figure 1, 180 of the 2167 patients who comprised the analysis  
209 population (8.3%) submitted data via the mobile health platform, of whom 93 were  
210 enrolled in DIAPAsOn on the basis of previous MI and 87 on a diagnosis of qualifying  
211 hyperlipidemia. From start to finish, three of the initial grouping of 183 patients who  
212 used the mobile health platform (1.6%) were withdrawn from the study or discontinued  
213 it, compared with 1025 of 2817 (36.4%) of those who did not submit data via the  
214 mobile platform. After establishment of the analysis population, early termination rates  
215 were 0% and 9.7%, respectively (Figure 1).

### 216 217 Compliance with OM3EE

218 The mean duration of OM3EE administration was 166.5 $\pm$ 70.6 days (median, 199  
219 days; range, 14–268 days).

220  
221 Among the 2167 patients whose compliance was monitored at clinical visits but not  
222 self-reported via the mobile app, the mean score on the National Questionnaire of



223 Treatment Compliance at Visit 3 was  $13\pm 3$  points, signifying high overall compliance  
224 with therapy. Mean scores  $>12$  were also recorded at Visit 1 ( $12.5\pm 3.1$ ) and Visit 2  
225 ( $13\pm 2.9$ ). Relative to the mean score at Visit 1, the mean scores at both Visits 2 and 3  
226 were statistically significantly larger ( $p<0.001$ ) (Table 1). The distribution of adherence  
227 categories for the total study population and for the two subpopulations of DIAPAsOn  
228 is shown in Figure 2. Overall, high or very high compliance was recorded for  $>90\%$  of  
229 respondents in both subseries.

230

231 A total of 69 patients (2.68%) discontinued OM3EE during the study. Numerically, the  
232 largest groups to do so were patients who cited inconvenience of use ( $n=11$ ) and  
233 those who reported absence of stock at pharmacies ( $n=6$ ). A total of 50 patients  
234 discontinued for a plurality of reasons, including cost of medication, reluctance to  
235 commit to long-term medication discontinued by another physician, normalization of  
236 blood lipid values and change of residence.

237

238 Inconvenience of use was more often recorded in patients enrolled in DIAPAsOn for  
239 hypertriglyceridemia than for secondary prevention (19% vs 5.9% of total cases).

240

241 Among the 180 patients who registered data via the DIAPAsOn mobile platform,  
242 adherence to therapy, expressed as the ratio of days when the full prescribed dose of  
243 OM3EE was taken to the total number of days in the treatment period, averaged  
244  $0.37\pm 0.38$  over the entire program, corresponding to a low level of adherence. Mean  
245 adherence between Visits 1 and 2 was  $0.48\pm 0.4$ , while that between Visits 2 and 3  
246 was  $0.24\pm 0.4$  ( $p<0.001$ ). Between Visits 1 and 2, 50.0% of patients had low adherence  
247 ( $<0.5$ ), 15.56% had moderate adherence (0.5–0.7) and 34.44% had high adherence  
248 ( $\geq 0.8$ ). Between Visits 2 and 3, the proportion of patients with low adherence  
249 increased to 75.0%, while the proportion with high adherence decreased to 20.56%.  
250 When the data were stratified by adherence level there was an essentially binary split,  
251 with most patients reporting either low adherence (74.44%) or high adherence (25%).

252

253 In the subgroup of 93 patients taking OM3EE for secondary prevention after MI and  
254 self-reporting adherence via the study app, mean adherence between Visits 1 and 3  
255 was  $0.47\pm 0.39$ , with 66.67% of patients recording low adherence and 32.26% high



256 adherence. Mean adherence in that subgroup at Visit 2 reached  $0.6\pm 0.38$ ; at Visit 3 it  
257 had decreased to  $0.33\pm 0.45$  ( $p < 0.001$  for trend). At Visit 2, 32.26% of patients had low  
258 adherence ( $< 0.5$ ) and 45.16% had high adherence ( $\geq 0.8$ ). By Visit 3, the proportion of  
259 patients with low adherence had increased to 67.74%, while the proportion with high  
260 adherence had declined to 30.11%.

261  
262 Among the 87 app-using patients taking OM3EE for hypertriglyceridemia, mean  
263 adherence between Visits 1 and 3 was  $0.25\pm 0.33$ , with most patients (82.76%) self-  
264 reporting low adherence, and 17.24% recording high adherence. In this subgroup,  
265 68.97% of patients had low adherence ( $< 0.5$ ) at Visit 2 and 22.99% had high  
266 adherence ( $\geq 0.8$ ). By Visit 3, those percentages had changed to 82.76% and 10.34%,  
267 respectively.

268  
269 Cross-referencing of the results on the National Questionnaire of Treatment  
270 Compliance administered at clinic visits with self-reported adherence based on the  
271 ratio of administered and prescribed dose established that, among patients identified  
272 by their response to the National Questionnaire as having 'very high', 'high' or  
273 'moderate' adherence to therapy, app-reported mean adherences for the time period  
274 between Visits 1 and 2 were 50.04%, 52.85% and 24.58%, respectively, while  
275 between Visits 2 and 3 adherence was 28.67% for those assessed as having 'very  
276 high' adherence by questionnaire, 19.11% for those in the 'high' category and 5.57%  
277 for those in the 'moderate' category.

278  
279 In the analysis population as a whole, 64.5% of patients rated the usability of OM3EE  
280 after 1 month of treatment as 'very good'. A further 29.9% and 5.6%, respectively  
281 rated usability as 'good' or 'moderate'. No patient rated usability as 'poor'. All the  
282 patients prescribed OM3EE for secondary prevention post-MI rated the usability as  
283 'very good' (70.7%) or 'good' (29.3%), while, among patients treated for  
284 hypertriglyceridemia, the usability of OM3EE was rated as 'very good' by 57.1% of  
285 patients, 'good' by 30.6% and 'moderate' by 12.2%.

286  
287  
288  
289

290 Lipid indices

291 At baseline, investigator-classified ‘clinically significant’ deviations from normal for total  
292 cholesterol (TC), LDL-C, high-density lipoprotein cholesterol (HDL-C) and TG were  
293 recorded in 46.1%, 40.93%, 14.4% and 64.97% of patients, respectively. Mean values  
294 of TC, TG, LDL-C, HDL-C and non-HDL-C (n-HDL-C) were  $5.55\pm 1.39$ ,  $2.99\pm 1.29$ ,  
295  $3.5\pm 1.25$ ,  $1.27\pm 0.46$  and  $4.29\pm 1.47$  mmol/L, respectively.

296  
297 In-study trends in mean blood lipid levels are depicted in Figure 3 for the overall  
298 DIAPAsOn cohort and for the two subpopulations differentiated by indication.

299  
300 Analysis of lipid profile stratified by baseline TG status revealed that increasing TG  
301 levels were associated with trends in TC that were potentially deleterious to  
302 cardiovascular health (Table 2).

303  
304 Lipid profile parameters were recorded at baseline at Visit 1, as well as after 3 months  
305 (Visit 2) and 6 months (Visit 3) of follow-up. Mean TC at Visit 1 was  $5.55\pm 1.39$  mmol/L.  
306 This had decreased to  $4.54\pm 1.04$  mmol/L ( $p<0.001$ ) by Visit 2, and at Visit 3 had been  
307 further reduced, to  $4.17\pm 1.04$  mmol/L ( $p<0.001$ ). Across the period of observation, the  
308 net average change in mean TC was thus  $-1.32\pm 1.28$  mmol/L.

309  
310 At Visit 2, mean LDL-C was  $2.71\pm 0.94$  mmol/L, an average reduction from Visit 1 of  
311  $0.77\pm 0.92$  mmol/L ( $p<0.001$ ). Further reduction was observed at Visit 3, when the  
312 mean LDL-C level was  $2.46\pm 0.76$  mmol/L ( $p<0.001$  vs Visit 1). The average net  
313 decrement in LDL-C was thus  $1.02\pm 1.02$  mmol/L.

314  
315 Mean HDL-C levels at Visits 1, 2 and 3 were, respectively,  $1.27\pm 0.46$ ,  $1.41\pm 0.42$   
316 ( $p<0.001$  vs Visit 1) and  $1.44\pm 0.42$  mmol/L ( $p<0.001$  vs Visit 1), with an average  
317 increment of  $0.2\pm 0.53$  mmol/L over the period of observation.

318  
319 n-HDL-C declined by an average of  $1.6\pm 1.54$  mmol/L during the period of observation,  
320 falling from  $4.27\pm 1.47$  mmol/L at Visit 1 to  $3.14\pm 1.12$  mmol/L at Visit 2 ( $p<0.001$  vs  
321 Visit 1) and to  $2.71\pm 1.0$  mmol/L at Visit 3 ( $p<0.001$  vs Visit 1).

322

323 Mean TG was  $3.0\pm 1.3$  mmol/L at Visit 1,  $2.0\pm 0.9$  mmol/L at Visit 2 and  $1.7\pm 0.7$  mmol/L  
324 at Visit 3 ( $p<0.001$  for both vs Visit 1). The overall average reduction in mean TG was  
325 thus  $1.32\pm 1.15$  mmol/L across the observation period.

326

327 Trends in overall TG levels during DIAPAsOn are displayed in more detail in Table 3,  
328 with patients assigned to one of three baseline distribution categories. Statistically  
329 significant changes in that distribution towards lower levels of TG were apparent at  
330 both Visits 2 and 3, with the percentage of patients recorded as having TG  $<1.7$   
331 mmol/L increasing from 13.1% at baseline to 54% at the conclusion of the study  
332 period, while the percentage recorded as having TG  $>2.3$  mmol/L fell from 66.9% to  
333 10.4%.

334

335 The average differences in TC, LDL and n-HDL-C between baseline and Visit 3 were a  
336 function of baseline TG. Thus, the reductions in patients with initial TG  $>2.3$  mmol/L  
337 were  $-1.47$ ,  $-1.1$  and  $-1.7$  mmol/L, respectively, while in patients with initial TG  $1.7-$   
338  $2.3$  mmol/L, the average intra-study changes from baseline to Visit 3 were  $-1.16$ ,  $-$   
339  $0.99$  and  $-1.32$  mmol/L. In patients with initial TG  $<1.7$  mmol/L the average changes in  
340 TC, LDL and n-HDL-C were  $-0.83$ ,  $-0.63$  and  $-0.94$  mmol/L, respectively. Significance  
341 was nevertheless apparent ( $p<0.001$ ) for each parameter in each of those subgroups.  
342 The mean change in HDL during observation versus baseline was  $+0.24$  mmol/L in  
343 patients with TG  $>2.3$  mmol/L ( $p<0.001$ ),  $+0.16$  mmol/L in patients with TG  $1.7-2.3$   
344 mmol/L ( $p<0.001$ ) and  $+0.09$  mmol/L in patients with TG  $<1.7$  mmol/L ( $p=0.002$ ). A  
345 statistically significant decrease in TG at Visit 3 versus baseline was observed only in  
346 subgroups of patients with baseline TG  $>2.3$  or  $1.7-2.3$  mmol/L ( $-1.81$  and  $-0.55$   
347 mmol/L, respectively;  $p<0.001$  for both subgroups).

348

349 Sub-analysis of the patients being treated for hypertriglyceridemia stratified according  
350 to the concomitant use/non-use of statins and/or fibrates identified no substantial or  
351 significant inter-group differences in baseline levels of blood lipid components.

352 Subsequent in-study trends in blood lipid fractions in both these subgroups are  
353 summarized in Table 4 and indicate significant longitudinal trends in both subgroups  
354 ( $p<0.001$  for all indices in both comparisons) and slightly more pronounced responses  
355 in those who were taking additional lipid-regulating drugs in combination with OM3EE.

356 Formal tests for inter-subgroup differences depending on the use/non-use of statins or  
357 fibrates were not conducted.

358

359 Changes between baseline and Visit 3 stratified by self-reported adherence registered  
360 via the study mobile app (n=180) identified no correlations or associations between  
361 the level of adherence and absolute changes in levels of lipids or lipoproteins.

362 The results of investigations into the relationship between rates of adherence and  
363 patient demographic factors for the whole analysis population are summarized in the  
364 *Supplementary Tables*.

365

#### 366 HRQoL outcomes

367 HRQoL data accrued from patients who contributed to the digital data collection  
368 element of DIAPAsOn are summarized in Table 5. Data for the 'General Health'  
369 domain were excluded due to a technical error during data transfer. Statistically  
370 significant increases in the scores for all domains except pain were recorded during  
371 the observation period. Further analysis, stratified by self-reported adherence to  
372 therapy (low, moderate or high), indicated that these improvements in HRQoL were  
373 restricted to patients with high compliance (data not shown; n=21–35).

374

375

#### 376 Safety and adverse events data

377

378 A safety population was identified that included all patients who had completed at least  
379 Visit 1 (n=2572).

380

381 A total of four adverse drug reactions (ADRs) were recorded in three patients (0.12%).  
382 Two patients had one ADR and one patient had two. No serious ADRs were recorded  
383 during DIAPAsOn.

384

385 Four deaths were recorded during the study, including one from cardiovascular  
386 disease. None of those deaths were causally related to use of OM3EE.

387

388 There were 20 instances of hospitalization due to cardiovascular diseases, none of  
389 which were attributed to use of OM3EE. Thirteen of these events affected participants

390 who were being treated for hypertriglyceridemia, all of whom were also being  
391 medicated with statins and/or fibrates.

392

393 OM3EE therapy was discontinued by 69 patients. Specified reasons for doing so  
394 comprised inconvenience of use (n=11), lack of availability in pharmacies (n=6) and  
395 lack of effect (n=2). Reasons for the remaining 50 discontinuations were recorded as  
396 'other'.

397

398

399

## 400 Discussion

401  
402 Considered overall, the data from DIAPAsOn suggest that the introduction of OM3EE  
403 had favorable effects on the blood lipid profile of our patients, consistent with  
404 experience in previous controlled trials. As illustrated in Table 3 the percentage of  
405 patients recorded as having TG <1.7 mmol/L quadrupled in response to OM3EE (from  
406 13.1% at baseline to 54% at the conclusion of the study); conversely the percentage  
407 of patients recorded as having TG >2.3 mmol/L fell to 10.4% from 66.9% at baseline.  
408 These changes were accompanied by alterations in other lipoprotein fractions  
409 compatible with an overall shift to a less atherogenic lipid profile, including reductions  
410 in non-HDL-C which declined by an average  $1.6 \pm 1.54$  mmol/l. This pattern of  
411 response to of OM3EE was substantially independent of the use or non-use of statins  
412 by patients treated for hypertriglyceridemia (Table 4).

413  
414 By implication, the levels of treatment adherence in both the digital and non-digital  
415 contingents of DIAPAsOn were sufficient to achieve those effects, notwithstanding  
416 discrepancies in the level of adherence reported by the two groups of patients.

417  
418 Among the analysis population in whom adherence was determined by in-clinic  
419 questioning adherence was consistently substantially higher in the post-MI subset  
420 than the hypertriglyceridemia subset ( $\Delta$  10–20%). As survivors of a major cardiac  
421 episode, those patients may be more motivated to continue with their medications than  
422 patients with an invisible and asymptomatic condition. This indication of a motivation  
423 element based on patients' clinical history is consistent with the findings of Gaisenok  
424 et al. in the PROFILE registry [22], but not wholly sustained by the findings of the  
425 ISLAND study [23]. Within the post-MI group adherence fell significantly at age >75  
426 years (75.31% vs >87.5% for all younger age deciles;  $p=0.007$ , chi-square test).

427 Frequency of dosing may also be an influence on the discrepancy in adherence  
428 between our two patient subgroups. The prescribed dose of OM3EE for secondary  
429 prevention post-MI is 1 g/day, whereas that for hypertriglyceridemia is 2–4 g/day. The  
430 up to fourfold difference in acquisition costs, plus the necessity of a twice-daily (vs  
431 once-daily) dosing regimen, may have contributed to the lower adherence recorded in  
432 the hypertriglyceridemia subgroup of DIAPAsOn, and perhaps to patients' views on

433 the usability of OM3EE. However, the detailed patient interviews required to elucidate  
434 this matter were not part of the study program.

435 'Very high' adherence was reported significantly more often by men than women,  
436 especially in the hypertriglyceridemia subset (67.71% vs 60.38%;  $p=0.007$ , chi-square  
437 test). Among patients with hypertriglyceridemia, 'very high' adherence was also  
438 significantly more likely in those who were recorded as not working (69.23% vs  
439 59.66%;  $p<0.001$ , chi-square test), suggesting perhaps an effect of competing  
440 priorities. Adherence was much higher among early school leavers than in any other  
441 category of education but, especially in the hypertriglyceridemia subset, this finding  
442 was based on small numbers ( $n=3$ ).

443 A further potentially strong influence on patient adherence and persistence is the  
444 personal beliefs of health professionals and general population attitudes. 'Therapeutic  
445 inertia' among physicians has been reported to contribute to poor management of  
446 cardiovascular risk factors in Russia and the USA [24,25]. The fact that 31% of the  
447 post-MI subgroup of DIAPAsOn were classified as current smokers may be indicative  
448 of attitudinal factors that operate to the general detriment of adherence.

449 A central purpose of DIAPAsOn was to examine how the use of digital technologies  
450 might promote adherence to OM3EE therapy. This aspect of the study provides  
451 inconclusive and somewhat perplexing insights. The online facilities developed for  
452 DIAPAsOn were used by 180 of the 2167 patients (8.3%) of the analysis population.  
453 Response rates to surveys are highly variable and there are indications that, at least in  
454 some instances, the rates of response to web-based exchanges are lower than are  
455 achieved with paper-based methods [26]. Nevertheless, the costs of administering  
456 follow-up at scale are substantially lower using digital technology than traditional print-  
457 based methods and the flexibility and potential immediacy of contact between  
458 physician and patient have a face-value attraction. Establishing why so many of our  
459 patients declined to adopt this option would require in-depth interviewing of several  
460 thousand patients and is beyond the resources of the study as originally conceived.  
461 Similarly, we are not equipped to investigate whether or how physicians advocated for  
462 this aspect of the study during clinic visits or how patients responded to  
463 encouragement.



464 Adherence to therapy for patients self-reporting via the DIAPAsOn digital platform was  
465 defined as the total number of days when the patient took the full prescribed dose of  
466 OM3EE during the specified period divided by the total number of days in that period.  
467 Calculated in that way, adherence appeared to be low in these patients and declined  
468 during the period of observation. However, we have no means of ascertaining whether  
469 the data that patients recorded accurately reflected their true adherence to study  
470 medication: actual adherence rates may therefore have been higher than the recorded  
471 findings suggest. Such a possibility would be compatible with the finding that in-study  
472 trends in lipid and lipoprotein indices were favorable and numerically very similar in a  
473 small group of digital adopters and the rest of the analysis population. We are unable  
474 to demonstrate any such alignment of adherence rates, however, finding instead a  
475 notable discrepancy between adherence rates registered by users of the DIAPAsOn  
476 app and those in whom adherence was assessed only at clinic visits despite broadly  
477 similar lipid responses in both subgroups.

478 Comparison of the digital subset with the main analysis population also identified no  
479 demographic differences between the two groups that might explain the adoption/non-  
480 adoption of the digital resources of DIAPAsOn. Wide-ranging technical obstacles  
481 seem unlikely given the high level of smartphone penetration in Russia [27], general  
482 access to the internet and the requirement for digital proficiency as an inclusion  
483 condition. Average age ( $\approx 58$  years) is not, *prima facie*, a sufficient explanation for the  
484 low level of digital uptake but may have exerted an influence that our study was not  
485 calibrated to identify.

486 Seemingly at variance with the low level of adoption of the mobile technology devised  
487 for DIAPAsOn—and the apparently low levels of medication adherence reported by  
488 those patients that used the technology—is the observation that the dropout rate  
489 among the digital adopters was zero. The impression of a subset of patients who are  
490 tenacious in their adherence to technology but inattentive to their medications is a  
491 paradox that we are at present unable to rationalize.

492 Another finding of note in the digitally engaged patients was that HRQoL indices  
493 showed a striking and sustained improvement among those who self-reported high  
494 compliance. Patient numbers were small, the structure of an observational study  
495 precludes determination of cause and effect and ascertaining reasons for this

496 improvement lie outside the scope of our research. This is, nevertheless, an intriguing  
497 finding that would merit attention in future investigation.

498 The considered view of mobile- or internet-based health interventions to promote  
499 adherence to therapy is that these innovations have potential but that both the quality  
500 and range of research need to be enhanced [28-30]. DIAPAsOn should be considered  
501 in that context. One lesson that might be extracted from our findings is that patient  
502 engagement and participation in the development of an online or mobile telephony-  
503 based adherence aid might produce longer-term gains in terms of patients' willingness  
504 to engage with the service once it is brought into daily use. DIAPAsOn might perhaps  
505 have benefited from a small-scale scoping study or a pilot phase before the  
506 technology was deployed in such a large patient population. Evaluation of our digital  
507 platform by means of the Mobile Application Rating Scale [31] might also have helped  
508 to refine the technology and enhance its acceptance by patients, and the failure to  
509 apply that test in advance may be considered a missed opportunity.

510 One hazard of such an approach, however, is that by catering to the priorities of  
511 patients well-disposed to mobile health technology the needs of 'digital exiles' are  
512 overlooked. DIAPAsOn required some evidence of individual technical competence  
513 from its patients but was otherwise non-restrictive in its eligibility criteria. To that extent  
514 it has provided useful insights into the sort of real-world populations that might be  
515 encountered (at least in Russia) and some of the challenges that these populations  
516 pose for proponents of mobile or ehealth services.

517 As with observational studies in general, the absence of a control group precludes any  
518 determination of cause and effect and the potential for biases in any trial of this type  
519 must be acknowledged. A retrospective calculation of the Nichol score [32] for  
520 DIAPAsOn confirmed that our study rated favorably in the subcategories 'Disease-  
521 Related Criteria' and 'Compliance Definition and Measurement Criteria' but scored  
522 less strongly in the subcategory 'Study Design Criteria'. The duration of follow-up was  
523 appropriate for a first assessment of a technical innovation but a substantially longer  
524 period of observation would be needed to demonstrate robust and meaningful  
525 improvements in long-term compliance and adherence, regardless of the methods or  
526 technologies used.

527

## 528 **Conclusions**

529 Data from DIAPAsOn collected in our study confirm the clinical profile of OM3EE as  
530 an effective and well-tolerated lipid-modifying therapy and as an appropriate element  
531 of the medical regimen(s) for management of hypertriglyceridemia or the secondary  
532 prevention of MI. Substantial (~1 mmol/L) baseline-dependent reductions in TG were  
533 recorded and other nominally advantageous alterations in the lipid profile were  
534 apparent, including reduction in levels of non-HDL-C, regardless of the concomitant  
535 use of statins and/or fibrates. Investigations into compliance with therapy produced  
536 conflicting results depending on the method of reporting used. Uptake of digital  
537 methods for self-reporting of adherence to therapy was low and indicates a need for  
538 further research into the factors that motivate or discourage patients to take advantage  
539 of such services and of how best to use those technologies to promote treatment  
540 compliance.

541

542 **Funding and disclosure**

543

544 The study is supported by Abbott.

545

546 GPA has not received any educational grants from any companies and has not  
547 received any fees or non-financial support from healthcare companies related to this  
548 study. GPA reports receiving honoraria for professional lectures at regional/national  
549 medical educational events from healthcare companies, including Abbott, Bayer,  
550 Boehringer Ingelheim, Servier.

551

552 AGA has not received any educational grants from any companies and has not  
553 received any fees or non-financial support from healthcare companies related to this  
554 study. AGA reports receiving honoraria for professional lectures at regional/national  
555 medical educational events from healthcare companies, including Abbott, Bayer,  
556 Boehringer Ingelheim, Servier.

557

558 FTA does not have any conflicts of interest.

559

560 TVF does not have any conflicts of interest.

561

562

563 **Acknowledgements**

564 The investigators thank the Ethics Committee of Pirogov Russian National Research  
565 Medical University for its advice and guidance on the development of the research  
566 protocol.

567 Manuscript preparation was assisted by **Hughes associates**, Oxford, UK.

568

569 Table 1. Trends in mean score on the National Questionnaire of Treatment  
570 Compliance between baseline (Visit 1) and Visit 2 (3 months of study participation) or  
571 Visit 3 (study completion, after 6 months).

572  
573

| Visit 1   | Visit 2    | Visit 3   | $\Delta$                | p-value |
|-----------|------------|-----------|-------------------------|---------|
| 12.5±3.11 |            |           |                         |         |
|           | 12.99±2.88 |           | <b>V2-V1: 0.47±2.46</b> | <0.001  |
|           |            | 12.9±2.99 | <b>V3-V1: 0.44±2.52</b> | <0.001  |

574  
575  
576

577 Table 2. Baseline lipid profile of the analysis population, stratified by TG status,  
578 identified progressively more atherogenic patterns of total and lipoprotein cholesterol  
579 as TG levels increased.

580

| <b>TG (mmol/l)</b> |        | <b>TC (mmol/l)</b> | <b>TG (mmol/l)</b> | <b>LDL-C (mmol/l)</b> | <b>HDL-C (mmol/l)</b> | <b>n-HDL-C (mmol/l)</b> |
|--------------------|--------|--------------------|--------------------|-----------------------|-----------------------|-------------------------|
| <1.7               | N      | 282                | 282                | 282                   | 282                   | 280                     |
|                    | Mean   | 4.67               | 1.21               | 2.93                  | 1.33                  | 3.37                    |
|                    | SD     | 1.33               | 0.31               | 1.14                  | 0.5                   | 1.4                     |
|                    | Median | 4.5                | 1.2                | 2.7                   | 1.2                   | 3.25                    |
| 1.7–2.3            | N      | 431                | 431                | 430                   | 431                   | 431                     |
|                    | Mean   | 5.31               | 2.04               | 3.39                  | 1.31                  | 4                       |
|                    | SD     | 1.24               | 0.19               | 1.3                   | 0.51                  | 1.4                     |
|                    | Median | 5.5                | 2.01               | 3.1                   | 1.2                   | 4.01                    |
| >2.3               | N      | 1438               | 1438               | 1438                  | 1438                  | 1437                    |
|                    | Mean   | 5.79               | 3.63               | 3.65                  | 1.25                  | 4.55                    |
|                    | SD     | 1.37               | 1.08               | 1.22                  | 0.44                  | 1.42                    |
|                    | Median | 5.9                | 3.4                | 3.5                   | 1.1                   | 4.6                     |

581

582

583 Table 3. Trends in overall TG levels during DIAPAsOn, stratified by baseline TG  
584 category.

585

| Visit | Parameter               | Baseline TG (mmol/l) |          |           |
|-------|-------------------------|----------------------|----------|-----------|
|       |                         | <1.7                 | 1.7–2.3  | >2.3      |
| 1     | N                       | 2151                 |          |           |
|       | n/%                     | 282/13.1             | 431/20   | 1438/66.9 |
| 2     | N                       | 2037                 |          |           |
|       | n/%                     | 787/38.6             | 670/32.9 | 580/28.5  |
|       | p-value Visit 2–Visit 1 | <0.001               | <0.001   | <0.001    |
| 3     | N                       | 1905                 |          |           |
|       | n/%                     | 1028/54              | 679/35.6 | 198/10.4  |
|       | p-value Visit 3–Visit 1 | <0.001               | <0.001   | <0.001    |

586



587 Table 4. Trends in lipid and lipoprotein fractions in patients enrolled in the analysis  
588 population of DIAPAsOn for hypertriglyceridemia and receiving or not receiving  
589 concomitant statins and/or fibrates.

590

591

592

|                                 | <b>TC<br/>(mmol/l)</b> | <b>TG (mmol/l)</b> | <b>LDL-C<br/>(mmol/l)</b> | <b>HDL-C<br/>(mmol/l)</b> | <b>n-HDL-C<br/>(mmol/l)</b> |
|---------------------------------|------------------------|--------------------|---------------------------|---------------------------|-----------------------------|
| <b>Statins or fibrates: YES</b> |                        |                    |                           |                           |                             |
| V3–V1<br>mean±SD                | -1.5±1.3               | -1.7±1.2           | -1.2±1.1                  | +0.2±0.5                  | -1.8±1.5                    |
| V3–V1<br>median                 | -1.44                  | -1.7               | -1.0                      | +0.2                      | -1.9                        |
| P-value (V3<br>vs. V1)*         | 0.001                  | 0.001              | 0.001                     | 0.001                     | 0.001                       |
|                                 |                        |                    |                           |                           |                             |
| <b>Statins or fibrates: NO</b>  |                        |                    |                           |                           |                             |
| V3–V1<br>mean±SD                | -1.4±1.3               | -1.5±1.1           | -0.84±0.9                 | 0.3±0.6                   | -1.7±1.6                    |
| V3–V1<br>median                 | -1                     | -1.32              | -0.7                      | +0.2                      | -1.3                        |
| P-value (V3<br>vs. V1)*         | 0.001                  | 0.001              | 0.001                     | 0.001                     | 0.001                       |

593

594 Table 5. HRQoL data accrued from patients who contributed to the digital data-  
595 collection element of DIAPAsOn. Differences (Visit 2- Visit 1) and (Visit 3- Visit 1) were  
596 paired and therefore estimated only for those patients who were scored on both  
597 relevant visits. Data for the 'General Health' domain were excluded due to a technical  
598 error during data transfer.  
599

| Visit | Parameter | PF    | RP     | RE     | E/F    | EW     | SF     | P     |
|-------|-----------|-------|--------|--------|--------|--------|--------|-------|
| 1     | N         | 82    | 82     | 82     | 82     | 82     | 82     | 82    |
|       | Mean      | 22.36 | 39.02  | 53.25  | 43.82  | 52.9   | 58.54  | 74.45 |
|       | SD        | 16.18 | 44.11  | 41.2   | 21.62  | 16.1   | 26.34  | 31.16 |
| 2     | N         | 51    | 50     | 50     | 49     | 49     | 50     | 49    |
|       | Mean      | 34.56 | 87.5   | 93.33  | 72.28  | 76.01  | 89.25  | 94.23 |
|       | SD        | 12.34 | 29.99  | 20.2   | 14.09  | 15.7   | 17.31  | 13.19 |
| 2-1   | N         | 35    | 35     | 35     | 35     | 35     | 35     | 35    |
|       | Mean      | 7.63  | 32.86  | 25.71  | 20.81  | 22.66  | 26.43  | 8.43  |
|       | SD        | 13.4  | 48.42  | 32.42  | 14.12  | 14.69  | 25.68  | 14.12 |
|       | p-value*  | 0.002 | <0.001 | <0.001 | <0.001 | <0.001 | <0.001 | 0.001 |
| 3     | N         | 22    | 22     | 22     | 22     | 22     | 22     | 22    |
|       | Mean      | 40.1  | 98.86  | 100    | 80.23  | 86.73  | 98.3   | 98.52 |
|       | SD        | 6.42  | 5.33   | 0      | 5.87   | 7.94   | 8      | 6.93  |
| 3-1   | N         | 22    | 22     | 22     | 22     | 22     | 22     | 22    |
|       | Mean      | 6.69  | 29.55  | 18.18  | 18.18  | 25     | 16.48  | -0.11 |
|       | SD        | 10.08 | 43.39  | 30.39  | 13.59  | 14.65  | 25.41  | 0.53  |
|       | p-value*  | 0.005 | 0.004  | 0.011  | <0.001 | <0.001 | 0.006  | 0.329 |

600

601 Figure 1. Derivation of patient subsets in the DIAPAsOn study.

602

603

604

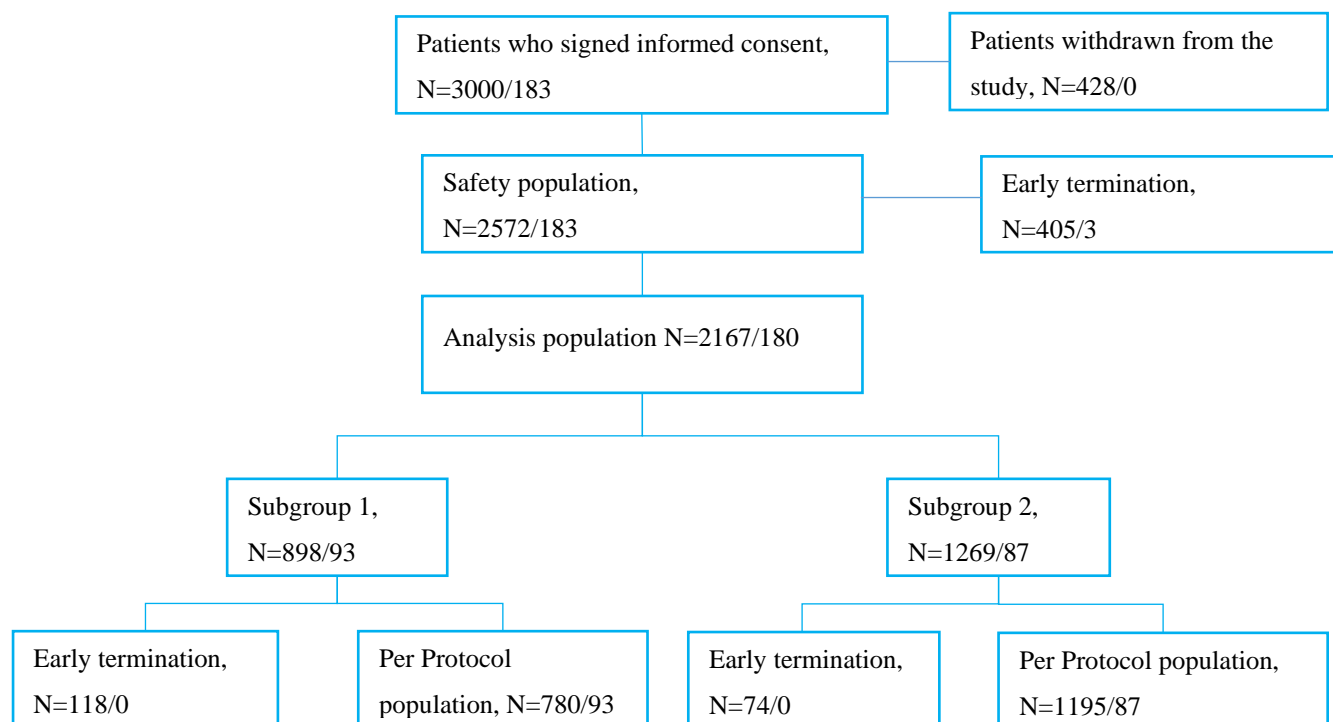

605 Figure 2. Distribution of adherence categories for the total study population and for the  
606 two subpopulations (post-MI and hypertriglyceridemia) of the DIAPAsOn analysis  
607 population, based on responses to the National Questionnaire of Treatment  
608 Compliance.

609  
610

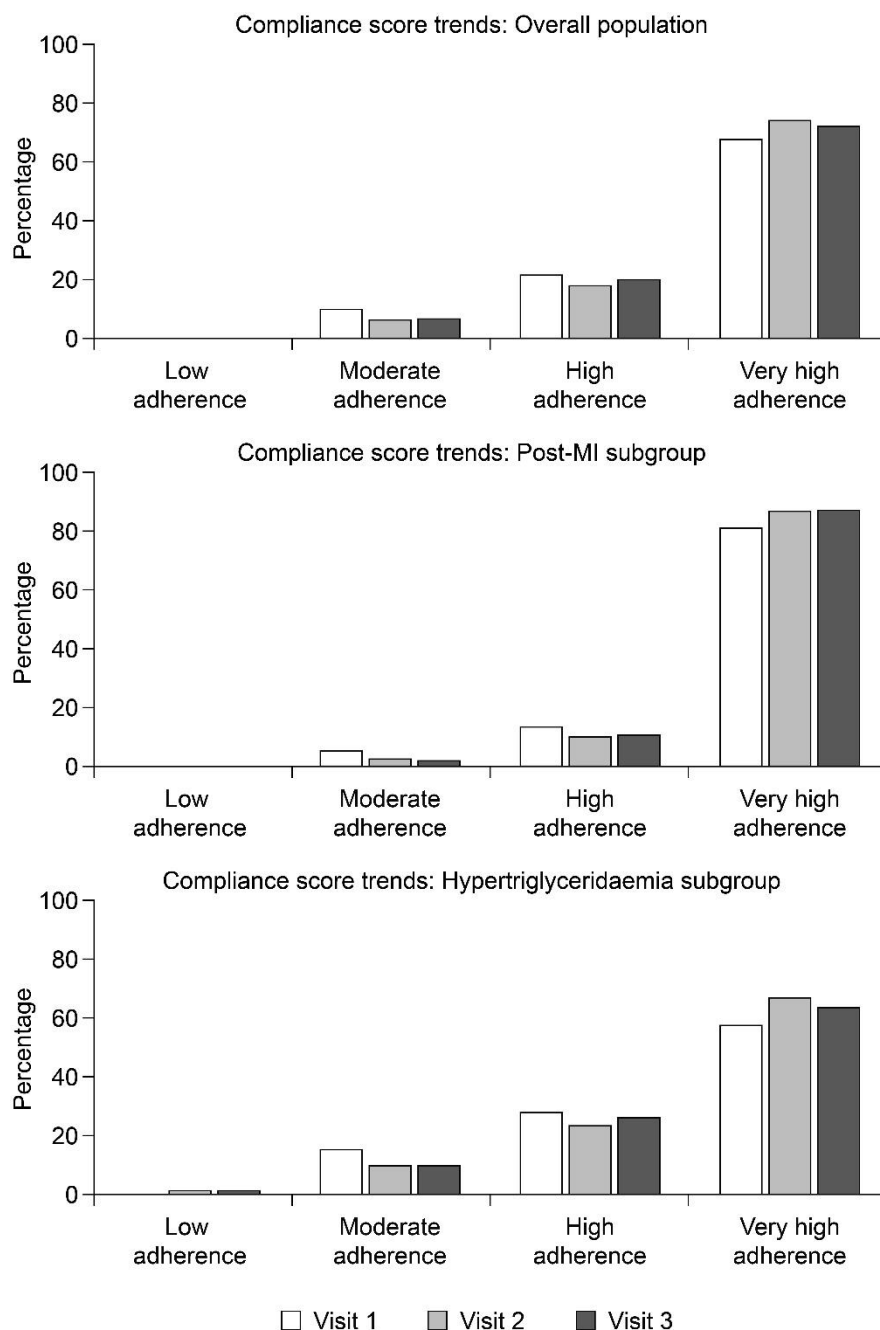

611

612 Figure 3. In-study trends in blood lipids in the total study population and for the two  
613 subpopulations (post-MI and hypertriglyceridemia) of the DIAPAsOn analysis  
614 population.

615  
616  
617  
618

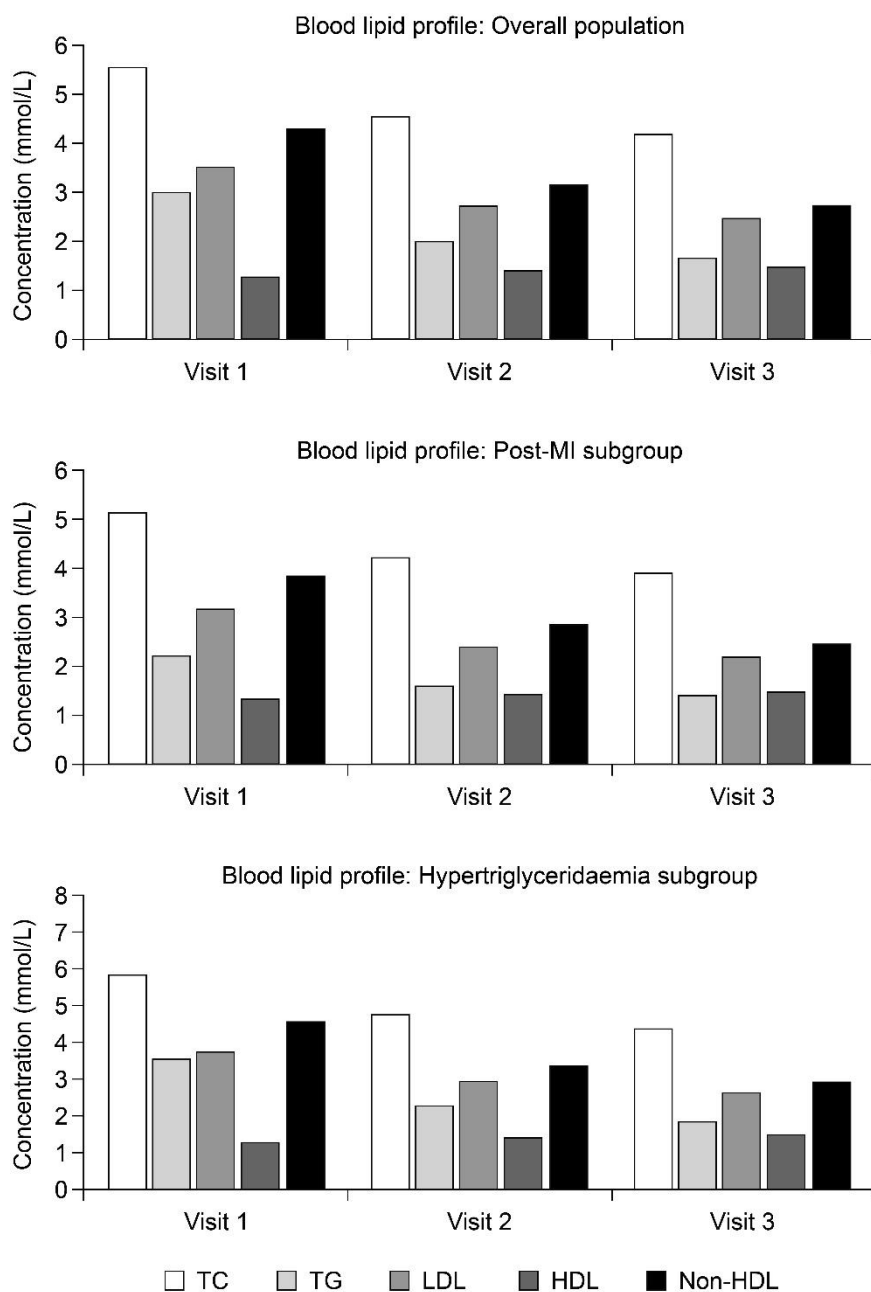

619  
620  
621  
622  
623  
624

625 *Supplementary Tables*

626

627 **Table S 1a. Assessment of the relationship between the rate of adherence and sex.**

| Visit                | Parameter                | Gender |                |        |          |
|----------------------|--------------------------|--------|----------------|--------|----------|
|                      |                          | Male   |                | Female |          |
|                      |                          | N      | Proportion (%) | N° Pt  | Rate (%) |
| Visit 1 –<br>Visit 3 | Total                    | 1039   | 100            | 936    | 100      |
|                      | Low adherence            | 1      | 0.1            | 7      | 0.75     |
|                      | Moderate adherence       | 52     | 5              | 83     | 8.87     |
|                      | High adherence           | 180    | 17.32          | 214    | 22.86    |
|                      | Very high adherence      | 806    | 77.57          | 632    | 67.52    |
|                      | Mean questionnaire score | 13.23  |                | 12.53  |          |
|                      | p-value*                 | <0.001 |                |        |          |

628 Note: data are of the PP population, N = 2167; \* $\chi$ -square.

629

630 **Table S1b. Assessment of the relationship between the rate of adherence to therapy and**  
631 **the sex of patients to whom OM3EE was prescribed as secondary preventive therapy**  
632 **after myocardial infarction.**

| Visit                | Parameter                | Gender |                |        |          |
|----------------------|--------------------------|--------|----------------|--------|----------|
|                      |                          | Male   |                | Female |          |
|                      |                          | N      | Proportion (%) | N° Pt  | Rate (%) |
| Visit 1 –<br>Visit 3 | Total                    | 528    | 100            | 252    | 100      |
|                      | Low adherence            | 0      | 0              | 0      | 0        |
|                      | Moderate adherence       | 10     | 1.89           | 7      | 2.78     |
|                      | High adherence           | 58     | 10.98          | 26     | 10.32    |
|                      | Very high adherence      | 460    | 87.12          | 219    | 86.9     |
|                      | Mean questionnaire score | 13.9   |                | 13.9   |          |
|                      | p-value*                 | 0.98   |                |        |          |

633 Note: data are of the PP population, N = 2167; \* $\chi$ -square.

634

635

636

637

638

639

640 **Table S1c. Assessment of the relationship between the rate of adherence to therapy and**  
641 **sex among patients to whom OM3EE was prescribed for hypertriglyceridemia**

| Visit                | Parameter                | Gender |                |        |                |
|----------------------|--------------------------|--------|----------------|--------|----------------|
|                      |                          | Male   |                | Female |                |
|                      |                          | N      | Proportion (%) | N      | Proportion (%) |
| Visit 1 –<br>Visit 3 | Total                    | 511    | 100            | 684    | 100            |
|                      | Low adherence            | 1      | 0.2            | 7      | 1.02           |
|                      | Moderate adherence       | 42     | 8.22           | 76     | 11.11          |
|                      | High adherence           | 122    | 23.87          | 188    | 27.49          |
|                      | Very high adherence      | 346    | 67.71          | 413    | 60.38          |
|                      | Mean questionnaire score | 12.54  |                | 12.03  |                |
|                      | p-value*                 | 0.007  |                |        |                |

642 Note: data are of the PP population, N = 2167; \* $\chi$ -square.

643

644 **Table S2a. Assessment of the relationship between the rate of adherence and age.**

645

| Visit                | Parameter                | Age group |                |       |                |       |                |       |                |
|----------------------|--------------------------|-----------|----------------|-------|----------------|-------|----------------|-------|----------------|
|                      |                          | 18-44     |                | 45-60 |                | 61-75 |                | >75   |                |
|                      |                          | N         | Proportion (%) | N     | Proportion (%) | N     | Proportion (%) | N     | Proportion (%) |
| Visit 1 –<br>Visit 3 | Total                    | 231       | 100            | 768   | 100            | 804   | 100            | 172   | 100            |
|                      | Low adherence            | 1         | 0.43           | 3     | 0.39           | 4     | 0.5            | 0     | 0              |
|                      | Moderate adherence       | 21        | 9.09           | 52    | 6.77           | 48    | 5.97           | 14    | 8.14           |
|                      | High adherence           | 55        | 23.81          | 167   | 21.74          | 137   | 17.04          | 35    | 20.35          |
|                      | Very high adherence      | 154       | 66.67          | 546   | 71.09          | 615   | 76.49          | 123   | 71.51          |
|                      | Mean questionnaire score | 12.45     |                | 12.78 |                | 13.15 |                | 12.87 |                |
|                      | p-value*                 | 0.007     |                |       |                |       |                |       |                |

646 Note: data are of the PP population, N = 2167; \* $\chi$ -square.

647

648

649



650 **Table S2b. Assessment of the relationship between the rate of adherence to therapy and**  
 651 **the age of patients to whom OM3EE was prescribed as secondary preventive therapy**  
 652 **after myocardial infarction.**

653

| Visit                | Parameter                | Age group |                |       |                |       |                |       |                |
|----------------------|--------------------------|-----------|----------------|-------|----------------|-------|----------------|-------|----------------|
|                      |                          | 18-44     |                | 45-60 |                | 61-75 |                | >75   |                |
|                      |                          | N         | Proportion (%) | N     | Proportion (%) | N     | Proportion (%) | N     | Proportion (%) |
| Visit 1 –<br>Visit 3 | Total                    | 48        | 100            | 273   | 100            | 378   | 100            | 81    | 100            |
|                      | Low adherence            | 0         | 0              | 0     | 0              | 0     | 0              | 0     | 0              |
|                      | Moderate adherence       | 1         | 2.08           | 3     | 1.1            | 8     | 2.12           | 5     | 6.17           |
|                      | High adherence           | 5         | 10.42          | 25    | 9.16           | 39    | 10.32          | 15    | 18.52          |
|                      | Very high adherence      | 42        | 87.5           | 245   | 89.74          | 331   | 87.57          | 61    | 75.31          |
|                      | Mean questionnaire score | 13.92     |                | 14.06 |                | 13.95 |                | 13.14 |                |
|                      | p-value*                 | 0.007     |                |       |                |       |                |       |                |

654 Note: data are of the PP population, N = 2167; \* $\chi$ -square.

655

656

657

658 **Table S2c. Assessment of the relationship between the rate of adherence to therapy and**  
 659 **age among patients to whom OM3EE was prescribed for hypertriglyceridemia.**

660

| Visit                | Parameter                | Age group |                |       |                |       |                |       |                |
|----------------------|--------------------------|-----------|----------------|-------|----------------|-------|----------------|-------|----------------|
|                      |                          | 18-44     |                | 45-60 |                | 61-75 |                | >75   |                |
|                      |                          | N         | Proportion (%) | N     | Proportion (%) | N     | Proportion (%) | N     | Proportion (%) |
| Visit 1 –<br>Visit 3 | Total                    | 183       | 100            | 495   | 100            | 426   | 100            | 91    | 100            |
|                      | Low adherence            | 1         | 0.55           | 3     | 0.61           | 4     | 0.94           | 0     | 0              |
|                      | Moderate adherence       | 20        | 10.93          | 49    | 9.9            | 40    | 9.39           | 9     | 9.89           |
|                      | High adherence           | 50        | 27.32          | 142   | 28.69          | 98    | 23             | 20    | 21.98          |
|                      | Very high adherence      | 112       | 61.2           | 301   | 60.81          | 284   | 66.67          | 62    | 68.13          |
|                      | Mean questionnaire score | 12.07     |                | 12.07 |                | 12.44 |                | 12.64 |                |
|                      | p-value*                 | 0.19      |                |       |                |       |                |       |                |

661 Note: data are of the PP population, N = 2167; \* $\chi$ -square.

662 **Table S3a. Assessment of the relationship between the rate of adherence and work status.**

| Visit             | Parameter                | Work status |                |               |                |
|-------------------|--------------------------|-------------|----------------|---------------|----------------|
|                   |                          | Works       |                | Does not work |                |
|                   |                          | N           | Proportion (%) | N             | Proportion (%) |
| Visit 1 – Visit 3 | Total                    | 1096        | 100            | 879           | 100            |
|                   | Low adherence            | 5           | 0.46           | 3             | 0.34           |
|                   | Moderate adherence       | 85          | 7.76           | 50            | 5.69           |
|                   | High adherence           | 251         | 22.9           | 143           | 16.27          |
|                   | Very high adherence      | 755         | 68.89          | 683           | 77.7           |
|                   | Mean questionnaire score | 12.66       |                | 13.2          |                |
|                   | p-value*                 | <0.001      |                |               |                |

663 Note: data are of the PP population, N = 2167; \* $\chi$ -square.

664

665

666 **Table S3b. Assessment of the relationship between the rate of adherence to therapy and**  
 667 **work status of patients to whom OM3EE was prescribed as secondary preventive therapy**  
 668 **after myocardial infarction.**

| Visit             | Parameter                | Work status |                |               |                |
|-------------------|--------------------------|-------------|----------------|---------------|----------------|
|                   |                          | Works       |                | Does not work |                |
|                   |                          | N           | Proportion (%) | N             | Proportion (%) |
| Visit 1 – Visit 3 | Total                    | 382         | 100            | 398           | 100            |
|                   | Low adherence            | 0           | 0              | 0             | 0              |
|                   | Moderate adherence       | 6           | 1.57           | 11            | 2.76           |
|                   | High adherence           | 47          | 12.3           | 37            | 9.3            |
|                   | Very high adherence      | 329         | 86.13          | 350           | 87.94          |
|                   | Mean questionnaire score | 13.9        |                | 13.9          |                |
|                   | p-value*                 | 0.99        |                |               |                |

669 Note: data are of the PP population, N = 2167; \* $\chi$ -square.

670

671

672 **Table S3c. Assessment of the relationship between the rate of adherence to therapy and**  
 673 **work status among patients to whom OM3EE was prescribed for hypertriglyceridemia.**

| Visit             | Parameter                | Work status |                |               |                |
|-------------------|--------------------------|-------------|----------------|---------------|----------------|
|                   |                          | Works       |                | Does not work |                |
|                   |                          | N           | Proportion (%) | N             | Proportion (%) |
| Visit 1 – Visit 3 | Total                    | 714         | 100            | 481           | 100            |
|                   | Low adherence            | 5           | 0.7            | 3             | 0.62           |
|                   | Moderate adherence       | 79          | 11.06          | 39            | 8.11           |
|                   | High adherence           | 204         | 28.57          | 106           | 22.04          |
|                   | Very high adherence      | 426         | 59.66          | 333           | 69.23          |
|                   | Mean questionnaire score | 11.99       |                | 12.62         |                |
|                   | p-value*                 | 0.001       |                |               |                |

674 Note: data are of the PP population, N = 2167; \* $\chi^2$ -square.

675

676

677

678 **Table S4a. Assessment of the relationship between the rate of adherence and education.**

679

| Visit             | Parameter                | Education                    |                |                   |                |                      |                |        |                |                          |                |
|-------------------|--------------------------|------------------------------|----------------|-------------------|----------------|----------------------|----------------|--------|----------------|--------------------------|----------------|
|                   |                          | Secondary education drop-out |                | Secondary general |                | Secondary vocational |                | Higher |                | Supplementary vocational |                |
|                   |                          | N                            | Proportion (%) | N                 | Proportion (%) | N                    | Proportion (%) | N      | Proportion (%) | N                        | Proportion (%) |
| Visit 1 – Visit 3 | Total                    | 15                           | 100            | 224               | 100            | 634                  | 100            | 1064   | 100            | 38                       | 100            |
|                   | Low adherence            | 0                            | 0              | 3                 | 1.34           | 3                    | 0.47           | 2      | 0.19           | 0                        | 0.19           |
|                   | Moderate adherence       | 0                            | 0              | 24                | 10.71          | 56                   | 8.83           | 52     | 4.89           | 3                        | 4.89           |
|                   | High adherence           | 1                            | 6.67           | 67                | 29.91          | 121                  | 19.09          | 192    | 18.05          | 13                       | 18.05          |
|                   | Very high adherence      | 14                           | 93.33          | 130               | 58.04          | 454                  | 71.61          | 818    | 76.88          | 22                       | 76.88          |
|                   | Mean questionnaire score | 14.27                        |                | 11.91             |                | 12.67                |                | 13.25  |                | 12.21                    |                |
|                   | p-value*                 | <0.001                       |                |                   |                |                      |                |        |                |                          |                |

680 Note: data are of the PP population, N = 2167; \* $\chi^2$ -square.

681

682

683 **Table S4b. Assessment of the relationship between the rate of adherence to therapy and education of**  
 684 **patients to whom OM3EE was prescribed as secondary preventive therapy after myocardial**  
 685 **infarction.**

686

| Visit             | Parameter                | Education                    |                |                   |                |                      |                |        |                |                          |                |
|-------------------|--------------------------|------------------------------|----------------|-------------------|----------------|----------------------|----------------|--------|----------------|--------------------------|----------------|
|                   |                          | Secondary education drop-out |                | Secondary general |                | Secondary vocational |                | Higher |                | Supplementary vocational |                |
|                   |                          | N                            | Proportion (%) | N                 | Proportion (%) | N                    | Proportion (%) | N      | Proportion (%) | N                        | Proportion (%) |
| Visit 1 – Visit 3 | Total                    | 12                           | 100            | 78                | 100            | 258                  | 100            | 419    | 100            | 13                       | 100            |
|                   | Low adherence            | 0                            | 0              | 0                 | 0              | 0                    | 0              | 0      | 0              | 0                        | 0              |
|                   | Moderate adherence       | 0                            | 0              | 3                 | 3.85           | 8                    | 3.1            | 6      | 1.43           | 0                        | 1.43           |
|                   | High adherence           | 1                            | 8.33           | 12                | 15.38          | 24                   | 9.3            | 46     | 10.98          | 1                        | 10.98          |
|                   | Very high adherence      | 11                           | 91.67          | 63                | 80.77          | 226                  | 87.6           | 367    | 87.59          | 12                       | 87.59          |
|                   | Mean questionnaire score | 14.17                        |                | 13.46             |                | 13.84                |                | 14.01  |                | 14.15                    |                |
| p-value*          | 0.3                      |                              |                |                   |                |                      |                |        |                |                          |                |

687 Note: data are of the PP population, N = 2167; \* $\chi$ -square.

688

689

690 **Table S4c. Assessment of the relationship between the rate of adherence to therapy and**  
 691 **education among patients to whom OM3EE was prescribed for hypertriglyceridemia.**

| Visit             | Parameter                | Education                    |                |                   |                |                      |                |        |                |                          |                |
|-------------------|--------------------------|------------------------------|----------------|-------------------|----------------|----------------------|----------------|--------|----------------|--------------------------|----------------|
|                   |                          | Secondary education drop-out |                | Secondary general |                | Secondary vocational |                | Higher |                | Supplementary vocational |                |
|                   |                          | N                            | Proportion (%) | N                 | Proportion (%) | N                    | Proportion (%) | N      | Proportion (%) | N                        | Proportion (%) |
| Visit 1 – Visit 3 | Total                    | 3                            | 100            | 146               | 100            | 376                  | 100            | 645    | 100            | 25                       | 100            |
|                   | Low adherence            | 0                            | 0              | 3                 | 2.05           | 3                    | 0.8            | 2      | 0.31           | 0                        | 0.31           |
|                   | Moderate adherence       | 0                            | 0              | 21                | 14.38          | 48                   | 12.77          | 46     | 7.13           | 3                        | 7.13           |
|                   | High adherence           | 0                            | 0              | 55                | 37.67          | 97                   | 25.8           | 146    | 22.64          | 12                       | 22.64          |
|                   | Very high adherence      | 3                            | 100            | 67                | 45.89          | 228                  | 60.64          | 451    | 69.92          | 10                       | 69.92          |
|                   | Mean questionnaire score | 14.67                        |                | 11.08             |                | 11.88                |                | 12.76  |                | 11.2                     |                |
| p-value*          | <0.001                   |                              |                |                   |                |                      |                |        |                |                          |                |

692 Note: data are of the PP population, N = 2167; \* $\chi$ -square.

693

694 **Table S5a. Assessment of the relationship between the rate of adherence and marital status.**

| Visit                | Parameter                | Marital status |                |         |                |          |                |         |                |
|----------------------|--------------------------|----------------|----------------|---------|----------------|----------|----------------|---------|----------------|
|                      |                          | Single         |                | Married |                | Divorced |                | Widowed |                |
|                      |                          | N              | Proportion (%) | N       | Proportion (%) | N        | Proportion (%) | N       | Proportion (%) |
| Visit 1 –<br>Visit 3 | Total                    | 82             | 100            | 1593    | 100            | 114      | 100            | 186     | 100            |
|                      | Low adherence            | 0              | 0              | 7       | 0.44           | 1        | 0.88           | 0       | 0              |
|                      | Moderate adherence       | 13             | 15.85          | 102     | 6.4            | 8        | 7.02           | 12      | 6.45           |
|                      | High adherence           | 13             | 15.85          | 320     | 20.09          | 24       | 21.05          | 37      | 19.89          |
|                      | Very high adherence      | 56             | 68.29          | 1164    | 73.07          | 81       | 71.05          | 137     | 73.66          |
|                      | Mean questionnaire score | 12.5           |                | 12.91   |                | 12.76    |                | 13.08   |                |
|                      | p-value*                 | 0.49           |                |         |                |          |                |         |                |

695 Note: data are of the PP population, N = 2167; \* $\chi$ -square.

696

697

698

699 **Table S5b. Assessment of the relationship between the rate of adherence to therapy and marital**  
 700 **status of patients to whom OM3EE was prescribed as secondary preventive therapy after**  
 701 **myocardial infarction.**

| Visit                | Parameter                | Marital status |                |         |                |          |                |         |                |
|----------------------|--------------------------|----------------|----------------|---------|----------------|----------|----------------|---------|----------------|
|                      |                          | Single         |                | Married |                | Divorced |                | Widowed |                |
|                      |                          | N              | Proportion (%) | N       | Proportion (%) | N        | Proportion (%) | N       | Proportion (%) |
| Visit 1 –<br>Visit 3 | Total                    | 31             | 100            | 574     | 100            | 57       | 100            | 118     | 100            |
|                      | Low adherence            | 0              | 0              | 0       | 0              | 0        | 0              | 0       | 0              |
|                      | Moderate adherence       | 4              | 12.9           | 7       | 1.22           | 3        | 5.26           | 3       | 2.54           |
|                      | High adherence           | 6              | 19.35          | 55      | 9.58           | 5        | 8.77           | 18      | 15.25          |
|                      | Very high adherence      | 21             | 67.74          | 512     | 89.2           | 49       | 85.96          | 97      | 82.2           |
|                      | Mean questionnaire score | 12.58          |                | 14.01   |                | 13.79    |                | 13.8    |                |
|                      | p-value*                 | 0.004          |                |         |                |          |                |         |                |

702 Note: data are of the PP population, N = 2167; \* $\chi$ -square.

703

704

705 **Table S5c. Assessment of the relationship between the rate of adherence to therapy and**  
706 **marital status among patients to whom OM3EE was prescribed for hypertriglyceridemia.**

| Visit             | Parameter                | Marital status |                |         |                |          |                |         |                |
|-------------------|--------------------------|----------------|----------------|---------|----------------|----------|----------------|---------|----------------|
|                   |                          | Single         |                | Married |                | Divorced |                | Widowed |                |
|                   |                          | N              | Proportion (%) | N       | Proportion (%) | N        | Proportion (%) | N       | Proportion (%) |
| Visit 1 – Visit 3 | Total                    | 51             | 100            | 1019    | 100            | 57       | 100            | 68      | 100            |
|                   | Low adherence            | 0              | 0              | 7       | 0.69           | 1        | 1.75           | 0       | 0              |
|                   | Moderate adherence       | 9              | 17.65          | 95      | 9.32           | 5        | 8.77           | 9       | 13.24          |
|                   | High adherence           | 7              | 13.73          | 265     | 26.01          | 19       | 33.33          | 19      | 27.94          |
|                   | Very high adherence      | 35             | 68.63          | 652     | 63.98          | 32       | 56.14          | 40      | 58.82          |
|                   | Mean questionnaire score | 12.45          |                | 12.29   |                | 11.74    |                | 11.84   |                |
|                   | p-value*                 | 0.42           |                |         |                |          |                |         |                |

707 Note: data are of the PP population, N = 2167; \* $\chi$ -square.

708

709 *Appendix 1. Listing of DIAPASoN center investigators.*

710

| Region           | Investigator                         |
|------------------|--------------------------------------|
| Astrakhan Oblast | 1. Borodulya Mihail Vasil'evich      |
| Bryansk Oblast   | 2. Petuhova Irina Leonidovna         |
| Vladimir Oblast  | 3. Timofeeva Irina Vladimirovna      |
| Volgograd Oblast | 4. Vorob'eva Svetlana Gennad'evna    |
|                  | 5. Gulova Ol'ga Aleksandrovna        |
|                  | 6. Dugencova Larisa Anatol'evna      |
|                  | 7. Sytilina Natal'ya Nikolaevna      |
| Voronezh Oblast  | 8. Trubicyna Irina Valentinovna      |
| Kemerovo Oblast  | 9. Krestova Ol'ga Sergeevna          |
| Krasnodar Krai   | 10. Alekseeva Elena Valer'evna       |
|                  | 11. Allaabed Hassan Adnanovich       |
|                  | 12. Bahmet'eva Irina Aleksandrovna   |
|                  | 13. Boldin Vasilij Borisovich        |
|                  | 14. Vikulova Larisa Vladimirovna     |
|                  | 15. Golovko Artyom Yur'evich         |
|                  | 16. Emuzova Liana Anatol'evna        |
|                  | 17. Zaharov Aleksandr Yur'evich      |
|                  | 18. Ivochkina Marina Ivanovna        |
|                  | 19. Imamutdinova Marina Vladimirovna |
|                  | 20. Kovalenko Fyodor Andreevich      |
|                  | 21. Minasyan Ani Kamoevna            |
|                  | 22. Mkrtycheva Angelina Gennad'evna  |
|                  | 23. Nikitina Elena Valer'evna        |
|                  | 24. Novikova Svetlana Valer'evna     |

| Region           | Investigator                          |
|------------------|---------------------------------------|
|                  | 25. Pavlovec Vadim Petrovich          |
|                  | 26. Perkova Elena Mihajlovna          |
|                  | 27. Prozorovskaya Yuliya Igorevna     |
|                  | 28. Ramenskaya Tat'yana Evgen'evna    |
|                  | 29. Raff Stanislav Anatol'evich       |
|                  | 30. Smolina Elena Garievna            |
|                  | 31. Subbotina Anastasiya Vladimirovna |
|                  | 32. Tatarinceva Zoya Gennad'evna      |
|                  | 33. Usmanova Natal'ya Aleksandrovna   |
|                  | 34. Hazhbieva Milana Musaevna         |
|                  | 35. Shadzhe Evgeniya Azamatovna       |
| Krasnoyarsk Krai | 36. Hamyt- Kyzy Ajperi Hamytovna      |
| Moscow           | 37. Adamyan Margarita Mamikonovna     |
|                  | 38. Belov Leonid L'vovich             |
|                  | 39. Brodichko Alena Ivanovna          |
|                  | 40. Bugaev Timofej Dmitrievich        |
|                  | 41. Vahrulina Natal'ya Konstantinovna |
|                  | 42. Grigor'eva Ekaterina Anatol'evna  |
|                  | 43. Dvorina Ol'ga Gennad'evna         |
|                  | 44. Dmitrieva Irina Mihajlovna        |
|                  | 45. Karaeva Aida Anzorovna            |
|                  | 46. Novosel'ceva Ekaterina Pavlovna   |
|                  | 47. Oganesyan Lala Konstantinovna     |
|                  | 48. Polyakova Natal'ya Olegovna       |
|                  | 49. Ryzhova Tat'yana Vladimirovna     |
|                  | 50. Smirnova Ol'ga L'vovna            |



| Region                        | Investigator                           |
|-------------------------------|----------------------------------------|
|                               | 51. Tavleeva Svetlana Nikolaevna       |
|                               | 52. Hrulenko Svetlana Borisovna        |
|                               | 53. Chernushenko Tat'yana Ivanovna     |
| Moscow Oblast                 | 54. Gukov Konstantin Aleksandrovich    |
|                               | 55. Gukova Tat'yana Sergeevna          |
|                               | 56. Malyarenko Elena Nikolaevna        |
|                               | 57. Sorokin Sergej Anatol'evich        |
| Nizhny Novgorod Oblast        | 58. Abramova Nataliya Arkad'evna       |
|                               | 59. Aksenova Nataliya Aleksandrovna    |
|                               | 60. Barsukova Nataliya Aleksandrovna   |
|                               | 61. Budarina Yuliya Gennad'evna        |
|                               | 62. Grushin Dmitrij Valer'evich        |
|                               | 63. Kolesnichenko Irina Vyacheslavovna |
|                               | 64. Lokonova Larisa Mihajlovna         |
|                               | 65. Fedorova Svetlana Nikolaevna       |
| Novosibirsk Oblast            | 66. Shurkevich Anastasiya Alekseevna   |
| Omsk Oblast                   | 67. Minzhasarova Saniya Hasangalievna  |
|                               | 68. Naumov Dmitrij Valer'evich         |
| Perm Krai                     | 69. Zhuravleva Natal'ya Alekseevna     |
| The Republic of Adygea        | 70. Shekhmirzova Dzhanelta Ruslanovna  |
| The Republic of Bashkortostan | 71. Gilyaeva El'vira Fanisovna         |
|                               | 72. Dmitriev Aleksej Valer'evich       |
|                               | 73. Murasova Rimma Ismagilovna         |
|                               | 74. Tarzimanova Yuliya Shamilevna      |
|                               | 75. Timerbulatov Timur Rasfarovich     |
| Tatarstan                     | 76. Ivanova Natal'ya Mihajlovna        |

| Region           | Investigator                              |
|------------------|-------------------------------------------|
| Rostov Oblast    | 77. Budanova Ol'ga Veniaminovna           |
|                  | 78. Lobe Aleksandra Ovanesovna            |
|                  | 79. Mazruho Marina Karpovna               |
|                  | 80. Morgun Nina Karpovna                  |
|                  | 81. Stupina Anna Alekseevna               |
| Ryazan Oblast    | 82. Grusheckaya Irina Stanislavovna       |
|                  | 83. Samarceva Yana Nikolaevna             |
| Samara Oblast    | 84. Aristova Tat'yana Vladimirovna        |
|                  | 85. Reznik Irina Mihajlovna               |
|                  | 86. Rybina Evgeniya Dmitrievna            |
|                  | 87. Sapunkova Svetlana Mihajlovna         |
|                  | 88. Filippovskaya Natal'ya Igorevna       |
|                  | 89. Chernova Viktoriya Nikolaevna         |
| Saint Petersburg | 90. Bulycheva-Samohina Lyubov' Vasil'evna |
|                  | 91. Omel'chenko Marina Yur'evna           |
|                  | 92. Saf'yanova Natal'ya Viktorovna        |
| Saratov Oblast   | 93. Mihajlova Elena Aleksandrovna         |
| Smolensk Oblast  | 94. Novik Lyudmila Mihajlovna             |
| Stavropol Krai   | 95. Vedeneva Elena Viktorovna             |
|                  | 96. Eremenko Aleksej Mihajlovich          |
|                  | 97. Kubanova Asiyat Borisovna             |
|                  | 98. Minasova Elena Nikolaevna             |
| Tomsk Oblast     | 99. Zubova Ol'ga Valer'evna               |
| Tula Oblast      | 100. Barabanova Tat'yana Yur'evna         |
|                  | 101. Dabizha Viktoriya Gennad'evna        |
|                  | 102. Kolomejceva Tat'yana Mihajlovna      |

| Region             | Investigator                          |
|--------------------|---------------------------------------|
|                    | 103. Prihod'ko Tat'yana Nikolaevna    |
| Tumen Oblast       | 104. Ahshiyatova Nastya Ibragimovna   |
| Khabarovsk Krai    | 105. Koroleva Ramilya Lotfullovna     |
| Chelyabinsk Oblast | 106. Malyutina Anastasiya Gennad'evna |
|                    | 107. Fanina El'vira Rinatovna         |

711

712

713

714

## 715 References

716

717 1. Kones R. Molecular sources of residual cardiovascular risk, clinical signals, and  
718 innovative solutions: relationship with subclinical disease, undertreatment, and  
719 poor adherence: implications of new evidence upon optimizing cardiovascular  
720 patient outcomes. *Vasc Health Risk Manag.* 2013;9:617-670.  
721 doi:10.2147/VHRM.S37119

722

723

724 2. Schwartz GG, Abt M, Bao W, DeMicco D, Kallend D, Miller M, et al. Fasting  
725 triglycerides predict recurrent ischemic events in patients with acute coronary  
726 syndrome treated with statins. *J Am Coll Cardiol* 2015;65:2267e75.

727

728 3. Hussain A, Ballantyne CM, Saeed A, Virani SS. Triglycerides and ASCVD Risk  
729 Reduction: Recent Insights and Future Directions. *Curr Atheroscler Rep.*  
730 2020;22(7):25. Published 2020 Jun 3. doi:10.1007/s11883-020-00846-8

731

732 4. Morrison A, Hokanson JE. The independent relationship between triglycerides  
733 and coronary heart disease. *Vasc Health Risk Manag* 2009;5 89–95.

734

735 5. Emerging Risk Factors Collaboration, Di Angelantonio E, Sarwar N, Perry P,  
736 Kaptoge S, Ray KK, Thompson A, Wood AM, Lewington S, Sattar N, Packard  
737 CJ, Collins R, Thompson SG, Danesh J. Major lipids, apolipoproteins, and risk  
738 of vascular disease. *JAMA* 2009;302:1993–2000.

739

740 6. Lorenzatti AJ, Toth PP. New Perspectives on Atherogenic Dyslipidaemia and  
741 Cardiovascular Disease. *Eur Cardiol.* 2020;15:1-9. Published 2020 Feb 26.  
742 doi:10.15420/ecr.2019.06

743

744 7. Vallejo-Vaz AJ, Corral P, Schreier L, Ray KK. Triglycerides and residual risk.  
745 *Curr Opin Endocrinol Diabetes Obes.* 2020;27(2):95-103.  
746 doi:10.1097/MED.0000000000000530

747

748 8. Miller M, Stone NJ, Ballantyne C, et al. Triglycerides and cardiovascular  
749 disease: a scientific statement from the American Heart Association.  
750 *Circulation.* 2011;123(20):2292-2333. doi:10.1161/CIR.0b013e3182160726

751

752

753 9. Fan W, Philip S, Granowitz C, Toth PP, Wong ND. Residual  
754 Hypertriglyceridemia and Estimated Atherosclerotic Cardiovascular Disease  
755 Risk by Statin Use in U.S. Adults With Diabetes: National Health and Nutrition  
756 Examination Survey 2007-2014. *Diabetes Care.* 2019;42(12):2307-2314.  
757 doi:10.2337/dc19-0501

758

- 759 10. Brown WV, Jacobson TA, Braun LT. Achieving adherence to lipid-lowering  
760 regimens. *J Clin Lipidol*. 2013;7(1):4-13. doi:10.1016/j.jacl.2012.11.004  
761
- 762 11. Tsuyuki RT, Bungard TJ. Poor adherence with hypolipidemic drugs: a lost  
763 opportunity. *Pharmacotherapy*. 2001;21(5):576-582.  
764 doi:10.1592/phco.21.6.576.34541  
765
- 766 12. Iakunchykova O, Averina M, Wilsgaard T, et al. Why does Russia have such  
767 high cardiovascular mortality rates? Comparisons of blood-based biomarkers  
768 with Norway implicate non-ischaemic cardiac damage. *J Epidemiol Community*  
769 *Health* Published Online First: 15 May 2020. doi: 10.1136/jech-2020-213885.  
770
- 771 13. Boytsov S, Logunova N, Khomitskaya Y; CEPHEUS II investigators.  
772 Suboptimal control of lipid levels: results from the non-interventional Centralized  
773 Pan-Russian Survey of the Undertreatment of Hypercholesterolemia II  
774 (CEPHEUS II). *Cardiovasc Diabetol*. 2017;16(1):158. Published 2017 Dec 16.  
775 doi:10.1186/s12933-017-0641  
776
- 777 14. Cybulsky M, Cook S, Kontsevaya AV, Vasiljev M, Leon DA. Pharmacological treatment  
778 of hypertension and hyperlipidemia in Izhevsk, Russia. *BMC Cardiovasc Disord*.  
779 2016;16:122. Published 2016 Jun 3. doi:10.1186/s12872-016-0300-9  
780
- 781 15. Toth PP, Granowitz C, Hull M, Anderson A, Philip S. Long-term statin  
782 persistence is poor among high-risk patients with dyslipidemia: a real-world  
783 administrative claims analysis. *Lipids Health Dis*. 2019;18(1):175. Published  
784 2019 Sep 16. doi:10.1186/s12944-019-1099-z  
785
- 786 16. Huber CA, Meyer MR, Steffel J, Blozik E, Reich O, Rosemann T. Post-  
787 myocardial Infarction (MI) Care: Medication Adherence for Secondary  
788 Prevention After MI in a Large Real-world Population. *Clin Ther*.  
789 2019;41(1):107-117. doi:10.1016/j.clinthera.2018.11.012
- 790 17. Gutstein AS, Copple T. Cardiovascular disease and omega-3s: Prescription  
791 products and fish oil dietary supplements are not the same. *J Am Assoc Nurse*  
792 *Pract*. 2017;29(12):791-801. doi:10.1002/2327-6924.12535  
793
- 794 18. Abdelhamid AS, Brown TJ, Brainard JS, et al. Omega-3 fatty acids for the  
795 primary and secondary prevention of cardiovascular disease. *Cochrane*  
796 *Database Syst Rev*. 2020;3(2):CD003177. Published 2020 Feb 29.  
797 doi:10.1002/14651858.CD003177.pub5
- 798 19. Redfern J. Smart health and innovation: facilitating health-related behaviour  
799 change. *Proc Nutr Soc*. 2017;76(3):328-332. doi:10.1017/S0029665117001094  
800
- 801 20. Arutyunov GP, Arutyunov AG, Ageev FT, Fofanova TV. Use of digital  
802 technology tools to examine patient adherence to a prescription omega-3  
803 polyunsaturated acids therapy intended to mitigate cardiovascular risk: protocol  
804 and preliminary demographic data from the DIAPAsOn prospective

- 805 observational study. *J Med Internet Res Prot. JMIR Res Protoc.* 2021 Aug  
806 30;10(8):e29061. doi: 10.2196/29061. PMID: 34459746; PMCID: PMC8438613  
807
- 808 21. Fofanova T.V., Ageev F.T., Smirnova M.D., Svirida O.N., Kuzmina A.E.,  
809 Thostov A.Sh., Nelyubina A.S. National questionnaire of treatment compliance:  
810 testing and application in outpatient practice // *Systemic hypertension | #2 |*  
811 2014, p. 13-16  
812
- 813 22. Gaisenok O, Martsevich S, Tripkosh S, Lukina Y. Analysis of lipid-lowering  
814 therapy and factors affecting regularity of statin intake in patients with  
815 cardiovascular disease enrolled in the PROFILE registry. *Rev Port Cardiol.*  
816 2015;34(2):111-116. doi:10.1016/j.repc.2014.08.021  
817
- 818 23. Ivers NM, Schwalm JD, Bouck Z, et al. Interventions supporting long term  
819 adherence and decreasing cardiovascular events after myocardial infarction  
820 (ISLAND): pragmatic randomised controlled trial. *BMJ.* 2020;369:m1731.  
821 Published 2020 Jun 10. doi:10.1136/bmj.m1731  
822
- 823 24. Drozdova LY, Martsevich SY, Voronina VP. Evaluation of cardiovascular risk  
824 factors prevalence and efficacy of their correction in physicians. Estimation of  
825 physicians' expertise in up-to-date clinical guidelines. Results of the  
826 "Physician's health and education" study. *Ration Pharmacother Cardiol.*  
827 2011;7(2):137–144 [Russian]  
828
- 829 25. Bradley CK, Wang TY, Li S, et al. Patient-Reported Reasons for Declining or  
830 Discontinuing Statin Therapy: Insights From the PALM Registry. *J Am Heart*  
831 *Assoc.* 2019;8(7):e011765. doi:10.1161/JAHA.118.011765  
832
- 833 26. Sebo P, Maisonneuve H, Cerutti B, Fournier JP, Senn N, Haller DM. Rates,  
834 Delays, and Completeness of General Practitioners' Responses to a Postal  
835 Versus Web-Based Survey: A Randomized Trial. *J Med Internet Res.*  
836 2017;19(3):e83. Published 2017 Mar 22. doi:10.2196/jmir.6308  
837
- 838 27. <https://www.statista.com/statistics/467166/forecast-of-smartphone-users-in-russia/>  
839
- 840 28. Gandapur Y, Kianoush S, Kelli HM, et al. The role of mHealth for improving  
841 medication adherence in patients with cardiovascular disease: a systematic  
842 review. *Eur Heart J Qual Care Clin Outcomes.* 2016;2(4):237-244.  
843 doi:10.1093/ehjqcco/qcw018  
844
- 845 29. Hamine S, Gerth-Guyette E, Faulx D, Green BB, Ginsburg AS. Impact of  
846 mHealth chronic disease management on treatment adherence and patient  
847 outcomes: a systematic review. *J Med Internet Res.* 2015;17(2):e52. Published  
848 2015 Feb 24. doi:10.2196/jmir.3951

- 849  
850 30. Adler AJ, Martin N, Mariani J, et al. Mobile phone text messaging to improve  
851 medication adherence in secondary prevention of cardiovascular disease.  
852 *Cochrane Database Syst Rev.* 2017;4(4):CD011851. Published 2017 Apr 29.  
853 doi:10.1002/14651858.CD011851.pub2
- 854  
855 31. Stoyanov SR, Hides L, Kavanagh DJ, Zelenko O, Tjondronegoro D, Mani M.  
856 Mobile app rating scale: a new tool for assessing the quality of health mobile  
857 apps. *JMIR Mhealth Uhealth.* 2015;3(1):e27. doi: 10.2196/mhealth.3422.  
858
- 859 32. Nichol MB, Venturini F, Sung JCY. A critical evaluation of the methodology of  
860 the literature on medication compliance. *Ann Pharmacother* 1999;33:531-40.  
861  
862  
863  
864  
865
